# Supplementary material
Source: PubMed Central journal article supplement (PMC9974792)
Supplement: NIHMS1863153-supplement-1.pdf [file NIHMS1863153-supplement-1.pdf]

1 **Supplementary methods**

2

3 **Targeting BRD4 and PI3K signaling pathways for the treatment of medulloblastoma**

4 Bharti Sethi, Virender Kumar, Thilina D. Jayasinghe, Yuxiang Dong, Donald R. Ronning,

5 Haizhen A. Zhong, Donald W. Coulter and Ram I. Mahato.

6

## 1 **Reagents and cell culture**

2 SF2523 (HY-101146) and LY294002 (HY-10108) were purchased from MedChem  
3 Express LLC. Cell culture media EMEM was purchased from the ATCC. DMEM was  
4 purchased from Hyclone Laboratories. FBS was purchased from BioTechne, antibiotic  
5 solution Anti-Anti was obtained from Sigma-Aldrich. Primary antibodies were obtained  
6 from Abcam, Biomatik, Cell signaling technology (CST), and Santacruz Biotech.  
7 Horseradish peroxidase (HRP) conjugated and florescent labeled secondary antibody  
8 were purchased from the Invitrogen (A16096) and Li-COR Biosciences (926-68070),  
9 respectively. All other reagents were obtained from Fisher Scientific.

## 10 **Cell culture conditions**

11 DAOY, HD-MB03, and ONS-76 MB cells were cultured in EMEM, DMEM, and  
12 RPMI, respectively, with 10% FBS and 1% Anti-Anti. All cells were maintained in an  
13 incubator at 37 °C temperature with relative humidity between 90 and 95% in the  
14 presence of 5% CO<sub>2</sub>.

## 15 **Synthesis and characterization of 8-(2,3-dihydrobenzo[b][1,4] dioxin-6-yl)-2-** 16 **morpholino-4H-chromen-4-one (MDP5).**

17 **Synthesis step1.** Phosphorous chloride (POCl<sub>3</sub>; 6 mL, 64 mmol) was added to a mixture  
18 of 3-bromo-2-hydroxybenzoic acid (3.48 g, 16 mmol) and N-acetylmorpholine (4.12 g, 32  
19 mmol) in chloroform (CHCl<sub>3</sub>; 10 mL). The resulting mixture was stirred at room  
20 temperature (RT) for 1 h and then heated at 70 °C for 24 h. After completion, reaction  
21 mixture was cooled to RT and quenched with water (50 mL), CHCl<sub>3</sub> (100 mL), and sodium  
22 acetate (NaOAc; 25 g, 305 mmol). The organic layer was separated, washed with 100

1 mL of brine, followed by the mixture of 50 mL of brine and 20 mL of 10% aqueous sodium hydroxide (NaOH), dried over magnesium sulfate (MgSO<sub>4</sub>), filtered, and concentrated to obtain the chromenone intermediate (945 mg, 19%, yellowish solid), which was purified by crystallization from methyl tert-butyl ether (MTBE).

5           **The chromenone intermediate was characterized by <sup>1</sup>H NMR as:** <sup>1</sup>H NMR (500 MHz, CDCl<sub>3</sub>) 8.10 (d, *J* = 8.0 Hz, 1H), 7.77 (d, *J* = 8.0 Hz, 1H), 7.23 (t, *J* = 8.0 Hz, 1H), 5.50 (s, 1H), 3.86 (t, *J* = 5.0 Hz, 4H), 3.59 (t, *J* = 5.0 Hz, 4H).

8           **Synthesis step 2.** 1,1'-Bis(diphenylphosphino)ferrocene)palladium(II) dichloride (PdCl<sub>2</sub> (DPPF), 40 mg, 0.055 mmol) was added to a mixture of the intermediate chromenone (ArBr, 310 mg, 1 mmol), 1,4-benzodioxane-6-boronic acid (ArB(OH)<sub>2</sub>, 360 mg, 2 mmol), and triethanolamine (TEA, 303 mg, 3 mmol) in dioxane (10 mL) and water (4 mL) under N<sub>2</sub>. The resulting mixture was heated at 100 °C for 6 h. After completion, mixture was cooled to RT and 50mL of water was added. Then mixture was extracted three times with ethyl acetate (EtOAc, 20 mL). The organic layer was washed with brine (50 mL), dried over MgSO<sub>4</sub>, filtered, and concentrated to provide crude product, which was purified by column chromatography (silica gel, EtOAc/EtOH = 3:1) followed by crystallization from ether to afford the desired product **MDP5** (281 mg, 77%) as a yellowish solid with melting point 182–184 °C.

19           **Step 2. MDP5 was characterized by <sup>1</sup>H NMR as:** <sup>1</sup>H NMR (500 MHz, CDCl<sub>3</sub>) 8.13 (d, *J* = 8.0 Hz, 1H), 7.53 (d, *J* = 8.0 Hz, 1H), 7.38 (t, *J* = 7.5 Hz, 1H), 7.05 (d, *J* = 1.5 Hz, 1H), 7.00 (dd, *J* = 7.5, 1.5 Hz, 1H), 6.94 (d, *J* = 8.0 Hz, 1H), 5.51 (s, 1H), 4.29–4.33 (m, 4H), 3.76 (t, *J* = 5.0 Hz, 4H), 3.40 (t, *J* = 5.0 Hz, 4H); <sup>13</sup>C NMR (125.7 MHz, CDCl<sub>3</sub>) 177.28,

1 162.52, 150.53, 143.47, 143.45, 133.25, 129.71, 129.46, 124.68, 124.67, 123.35, 122.47,  
2 118.37, 117.08, 86.96, 65.94, 64.49, 64.36, 44.78.

### 3 **Molecular docking**

4 The minimized proteins were imported to Maestro (Maestro and Glide dock  
5 reference) using the OPLS\_2005 force field with backbone atoms restrained to reduce  
6 steric repulsion and, in the meantime, to minimize the impact on the backbone atoms.  
7 Structures of LY294002, quercetin, SF2523, SF2535, ABBV\_744, IBET\_762, and MDP1-  
8 MDP5 were built and minimized with MMFF force field using MOE program. The  
9 minimized structures were used to prepare the Grid files that identify and describe the  
10 binding pocket using the Glide Grid Generation protocol with the bound ligand as the  
11 centroid.

12 Three model proteins as defined by the grid file were used to dock the ligand  
13 structures of LY294002, quercetin, SF2523, SF2535, ABBV\_744, IBET\_762, and MDP1-  
14 MDP5. To allow some receptor flexibility during docking and extra-precision approach  
15 was applied and the scaling factor for receptor van der Waals for the nonpolar atoms was  
16 set to 0.8. The remaining parameters were used unchanged. The protein/ligand  
17 complexes were expressed as docking scores, where higher negative docking score  
18 indicate stronger ligand binding. The PyMOL program (*PYMOL Schrödinger, New York*)  
19 was used to generate protein/ligand interactions figures.

### 20 **BRD2-BD2/BRD4-BD2 molecular cloning, expression, and purification**

21 For Large-scale production of proteins, transformed E. coli were grown in LB media  
22 supplemented with carbenicillin (264 mM). Cells were incubated at 37 °C with constant

1 shaking (100 RPM) until the OD<sub>600nm</sub> reached to 0.6. Next, 1 mM isopropyl β-D-1-  
2 thiogalactopyranoside was added to the cultures (16 °C), to induce the protein  
3 expression. Cells were harvested after 20 hours of induction. The resulting cell pellet was  
4 resuspended in a lysis buffer containing 50 mM Tris pH 7.5, 200 mM NaCl, 0.5 mM  
5 imidazole, and 0.3 mM tris(2-carboxyethyl) phosphine (TCEP). The cell suspension was  
6 treated with DNase-I and lysozyme, placed on ice for 30 min, and then sonicated to lyse  
7 the cells. Clarification of the lysate was accomplished by centrifugation at 12,000 rpm for  
8 45 minutes. A metal affinity cobalt column of 5 mL capacity was pre-equilibrated with lysis  
9 buffer and then used to separate the supernatant. Then, unbound *E. coli* proteins were  
10 eliminated by passing 25 column volumes of lysis buffer. Elution buffer containing 50 mM  
11 Tris pH 7.5, 200 mM NaCl, 150 mM imidazole, and 0.3 mM TCEP was used to elute  
12 recombinant protein, isocratically. The N-terminal histidine tag of the recombinant protein  
13 was cleaved using the rhinovirus 3C protease, and the sample was dialyzed against a  
14 buffer containing 50 mM Tris pH 7.5, 100 mM NaCl and 0.3 mM TCEP. After 12 hours,  
15 the protein solution was run through a 5 mL cobalt column that had been pre-equilibrated  
16 with dialysis buffer. The flowthrough constituted the recombinant protein without the His-  
17 tag was collected.

### 18 **Protein thermal shift assay**

19 Protein Thermal Shift Dye (ThermoFisher) was also added to 1X concentration.  
20 Under these conditions, 3 protein melting curves with each respective BD and 100 mM  
21 final concentration of ligand were performed from 25 to 95 °C with a ramp rate of 0.5  
22 °C/min. Evaluation of the derivative of the fluorescence signal employed the Applied

1 Bioscience Protein Thermal Shift Software version 1.3 to determine the average melting  
2 temperature ( $T_m$ ) for each sample and the standard deviation(s) of those  $T_m$  values.

### 3 **Protein crystallization and X-ray diffraction experiments**

4 All complexes were incubated on ice for 4 hours prior to crystallization. For  
5 crystallization, the hanging drop vapor diffusion technique was used, and drops were  
6 made by combining 2  $\mu$ L of reservoir well solution with 2  $\mu$ L of the protein-inhibitor  
7 complexes. The 100  $\mu$ L well solution of BRD2-BD1/inhibitor complex consisted of 0.2 M  
8 sodium tartrate dibasic dihydrate pH 7.5 and 20 % w/v PEG 1000. The solution containing  
9 0.1 M Bis-Tris of pH 6.5, 16 % w/v PEG 3350, and 0.1 M HEPES of pH 7.5 was used for  
10 the BRD2-BD2/inhibitor and BRD4-BD2/inhibitor complexes, respectively. The resulting  
11 crystals were observed after four days. For cryoprotection, 2  $\mu$ L of 50 % w/v PEG-3350  
12 was added to the crystallization drop. In preparation for X-ray diffraction experiments,  
13 cryoprotected crystals were harvested and flash-cooled in liquid nitrogen. The ligand-free  
14 BRD4-BD2 crystals were prepared by mixing 2  $\mu$ L of 5 mg/mL protein and 2  $\mu$ L of well  
15 solution (0.1 M HEPES pH 7.5, 28 % w/v PEG 3350). The ligand-free BRD4-BD2 crystals  
16 were cryoprotected and flashed-cooled according to the procedure described above.

17 Molecular replacement used the previously published BRD2-BD2/HWV complex  
18 structure (RCSB accession number 6E6J)EJ Faivre, KF McDaniel, DH Albert, SR  
19 Mantena, JP Plotnik, D Wilcox, L Zhang, MH Bui, GS Sheppard, L Wang, et al. [1], and  
20 BRD4-BD2/89J complex structure (RCSB accession number 5UF0) [2] as the search  
21 models for phasing the BRD2-BD2/MDP5, SF2523, and BRD4-BD2/ SF2523 and ligand-  
22 free BRD4-BD2, respectively, using Phaser [3] in PHENIX [4]. All refinements were  
23 performed using PHENIX. COOT was used for visualization and manual refinement of

1 the structures [5]. Structure validation was performed in PHENIX using MolProbity and  
2 by RCSB following submission of coordinates and phases [6].

### 3 **Cell viability and migration assays**

4 Briefly,  $3 \times 10^3$  cells/well were grown for overnight in 96 well plate and then treated  
5 for 48 h with different drug concentrations. MTT (Biosynth Carbosynth; T-2450) reagent  
6 was added to the treated cells and incubated for 4 h. The media was removed carefully  
7 without disturbing the crystals and added 200 $\mu$ L DMSO to dissolve formazan crystals.  
8 The absorbance was measured at 560 nm using a microplate reader (Molecular Devices  
9 Me5). The IC<sub>50</sub> was determined by nonlinear least square regression by performing each  
10 experiment in triplicate.

11 For transwells migration assay, cells were trypsinized and approximately  $1 \times 10^5$  cells  
12 were suspended in serum free media and added into apical chamber of insert while media  
13 containing FBS was placed in the basolateral chamber of a 24 wells plate. After 24 h,  
14 cells from apical side were washed with PBS thrice and removed with an cotton tipped  
15 applicator. Next, migrated cells on the dorsal side of the insert membrane were fixed and  
16 stained for 30 minutes with formalin and 0.5% crystal violet, respectively. The images  
17 were captured using light microscope at 20 $\times$  magnification. After that, 10% acetic acid  
18 solution was used to dissolve stained cells and optical density (OD) was measured at  
19 590nm.

20 For wound healing/scratch assay, both MB cells were grown in 6 well plates for  
21 overnight to form a monolayer. Sterile cell scraper was used to create scratch or wound  
22 in the center of the wells, washed twice with PBS to remove unattached cells, and then

1 monolayer were treated with SF2523, MDP1, and MDP5 with concentration of 5.0  $\mu\text{M}$ .  
2 The images were taken at 0 and 24 h with light microscope at 4 $\times$  magnification.

### 3 **Effect of MDP5 on colony formation, cell cycle, and apoptosis**

4 For colony formation assay, approximately 500 DAOY and HD-MB03 cells were  
5 grown on 6 well plates for overnight and treated with drugs at 5.0  $\mu\text{M}$  concentration. After  
6 48 hours of treatment, the medium was changed to drug-free media, and allowed the cells  
7 to continue grow for 12–14 days. Cells were rinsed thrice with PBS, fixed with 10%  
8 formalin, and stained with a 0.5% solution of crystal violet dye (Fisher Scientific; C581-  
9 25) in 20% methanol. After taking pictures, the colonies were dissolved in 10% acetic acid  
10 solution to measure the optical density (OD).

11 Cell cycle distribution was determined in proliferating MB cells. Cells ( $0.2 \times 10^6$ )  
12 were seeded in a 6 wells plate, and growth inhibition was induced by adding drug  
13 solutions at the concentration of 5.0  $\mu\text{M}$  for 48 h. Cells were harvested with 0.25% EDTA-  
14 free trypsin (Gibco, USA) and washed twice in ice-cold PBS. Control and treated cells  
15 ( $0.1 \times 10^6$ ) were stained with FxCycle PI/RNase Staining Solution (ThermoFisher  
16 Scientific) and analyzed for DNA content via flow cytometry. For apoptosis assay, the  
17 cells were collected as above and stained in dark for 5 min with 5  $\mu\text{L}$  Annexin V-FITC and  
18 10 $\mu\text{L}$  propidium iodide (PI) in 500  $\mu\text{L}$  of 1  $\times$  binding buffer. Flow cytometry (FACS Calibur  
19 cytometer, BD Biosciences) was performed to quantify and calculate the cell apoptosis  
20 rate.

### 21 **RT-qPCR and Western blot analysis**



1           The cells were washed three times with cold PBS before total RNA was isolated  
2 with RNA extraction kit (RNeasy, Qiagen). cDNA was synthesized by reverse  
3 transcription using TaqMan Reverse Transcription Reagents (applied biosystems;  
4 N8080234). Next, RT-qPCR were run using above synthesized cDNA, primers, SYBR  
5 green, and RNase free water (Roche Light cycler 480 SYBR Green I Master;  
6 04707516001). The gene expression levels were calculated using  $2^{-\Delta\Delta Cq}$  method with  $\beta$ -  
7 actin as the internal reference gene.

8           To detect the target protein expression in MB cells, treatments were performed as  
9 mentioned above. Protein was extracted from cells with RIPA buffer in the presence of  
10 protease and phosphatase inhibitors. The concentration of protein was quantified by BCA  
11 assay. Then Laemmli were added to protein and boiled for 5 min to denature the protein.  
12 Next, 40 $\mu$ g of lysate protein was run on SDS page. Next, protein was transferred from gel  
13 to polyvinylidene difluoride (PVDF) membrane. Membrane was incubated with 5%  
14 solution of non-fat dry milk in Tris-buffered saline plus Tween 20 for 1 h, following four-  
15 five washing for 5 min each. Membrane was probed against several primary antibodies  
16 such as GLI1, GLI2, MYCN, p-MYCN, CyclinD1, p-PI3K, PI3K, p-Akt, Akt, and  $\beta$ -actin for  
17 overnight in 4°C. Next, membrane was washed for five times with TBST and incubated  
18 with secondary antibodies conjugated with HRP and labeled with IR dye (1:10000) at  
19 room temperature for 1 h. Before scanning (iBright FL1000; Invitrogen), membrane was  
20 washed with TBST four times.

## 21 **Tumor spheroid assay**

22           For tumor spheroids assay, 1500 and 500 DAOY and HD-MB03 cells were  
23 suspended in 100 $\mu$ L media and seeded in ultra-low attachment (ULA) 96-well plate for a

1 week and 50µL of media was replaced by fresh media every third day and spheroid size  
2 was track under fluorescent microscope. When tumor spheroid size reached to 200 µm,  
3 then spheroids were treated with SF2523, MDP1, and MDP5 with concentration of 5.0  
4 µM. After 7 days of treatment period, spheroids were stained with Calcein AM (2µM) and  
5 ethidium homodimer1 (3µM) (LIVE/DEAD™; L3224) to check the live/dead cells. Images  
6 were taken by confocal laser microscope (Zesis LSM 710) with 10X magnification at 40µm  
7 depth.

## 8 **Animal studies**

9 All animal experiments were conducted according to protocols approved by the  
10 Institutional Animal Care and Use Committee (IACUC) of the University of Nebraska  
11 Medical Center and met federal guidelines. We generated subcutaneous and orthotopic  
12 MB mouse models in this study. For establishing the subcutaneous model, DAOY cells  
13 ( $1 \times 10^6$ ) and HD-MB03 cells ( $2 \times 10^6$ ) were injected into the right and left flank, respectively,  
14 of 8-10 weeks old male and female mice. Tumor growth was measured non-invasively by  
15 using vernier calipers. For both measurements, tumor volumes were calculated by using  
16 the following formula:  $\text{Volume} = (\text{Length} \times \text{Width}^2)/2$

17 To establish orthotopic MB model, stably luciferase expressing DAOY cells  
18 ( $0.1 \times 10^6$ ) were used to generate the orthotopic MB tumor in NSG mice. Bioluminescence  
19 imaging using IVIS (Spectrum) was done to monitor the tumor growth weekly after  
20 implantation surgery.

21

22

## 1   **References**

- 2   1.     Favre EJ, McDaniel KF, Albert DH, Mantena SR, Plotnik JP, Wilcox D, Zhang L, Bui MH, Sheppard  
3         GS, Wang L *et al*: **Selective inhibition of the BD2 bromodomain of BET proteins in prostate**  
4         **cancer**. *Nature* 2020, **578**(7794):306-310.
- 5   2.     Wang L, Pratt JK, Soltwedel T, Sheppard GS, Fidanze SD, Liu D, Hasvold LA, Mantei RA, Holms JH,  
6         McClellan WJ *et al*: **Fragment-Based, Structure-Enabled Discovery of Novel Pyridones and**  
7         **Pyridone Macrocycles as Potent Bromodomain and Extra-Terminal Domain (BET) Family**  
8         **Bromodomain Inhibitors**. *Journal of Medicinal Chemistry* 2017, **60**(9):3828-3850.
- 9   3.     McCoy AJ, Grosse-Kunstleve RW, Adams PD, Winn MD, Storoni LC, Read RJ: **Phaser**  
10        **crystallographic software**. *Journal of Applied Crystallography* 2007, **40**(4):658-674.
- 11 4.     Adams PD, Afonine PV, Bunkoczi G, Chen VB, Davis IW, Echols N, Headd JJ, Hung L-W, Kapral GJ,  
12         Grosse-Kunstleve RW *et al*: **PHENIX: a comprehensive Python-based system for**  
13         **macromolecular structure**  
14         **solution**. *Acta Crystallographica Section D* 2010, **66**(2):213-221.
- 15 5.     Emsley P, Cowtan K: **Coot: model-building tools for molecular graphics**. *Acta Crystallographica*  
16         *Section D* 2004, **60**(12 Part 1):2126-2132.
- 17 6.     Williams CJ, Headd JJ, Moriarty NW, Prisant MG, Videau LL, Deis LN, Verma V, Keedy DA, Hintze  
18         BJ, Chen VB *et al*: **MolProbity: More and better reference data for improved all-atom structure**  
19         **validation**. *Protein Sci* 2018, **27**(1):293-315.
- 20

## **Targeting BRD4 and PI3K signaling pathways for the treatment of medulloblastoma**

Bharti Sethi, Virender Kumar, Thilina D. Jayasinghe, Yuxiang Dong, Donald R. Ronning, Haizhen

A. Zhong, Donald W. Coulter and Ram I. Mahato

This PDF file includes:

Supplement Figures: S1 to S9

Supplement Tables: S1 to S5

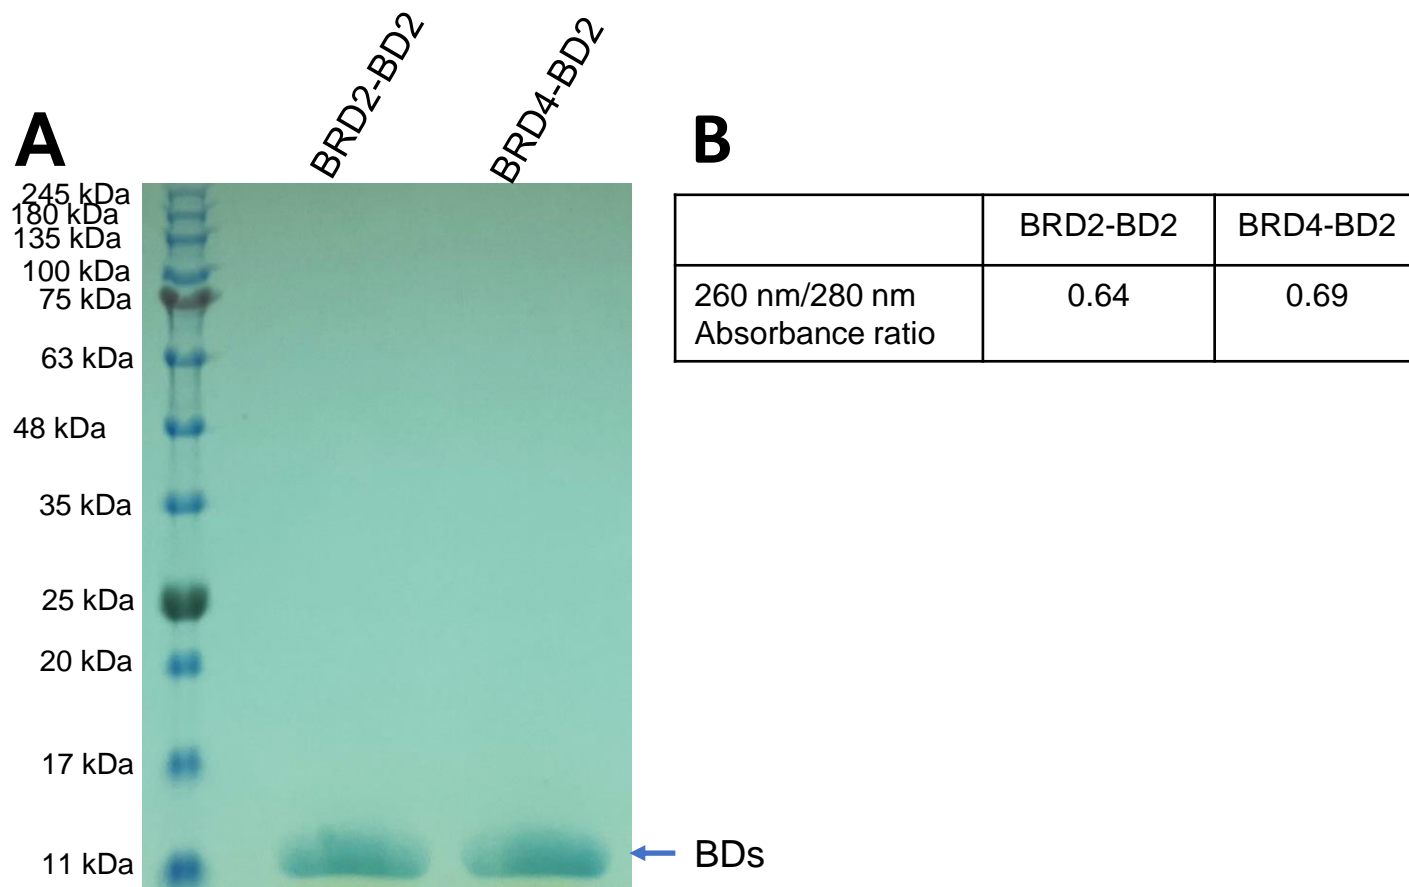

**Figure S1.** The purity assessment of BRD2-BD2 and BRD4-BD2. **A.** SDS-PAGE gel image of purified BRD2-BD2 and BRD4-BD2. **B.** The 260/280 nm wavelength absorbance ratio of each purified proteins illustrating a lack of nucleic acid contamination.

### a <sup>1</sup>H-NMR

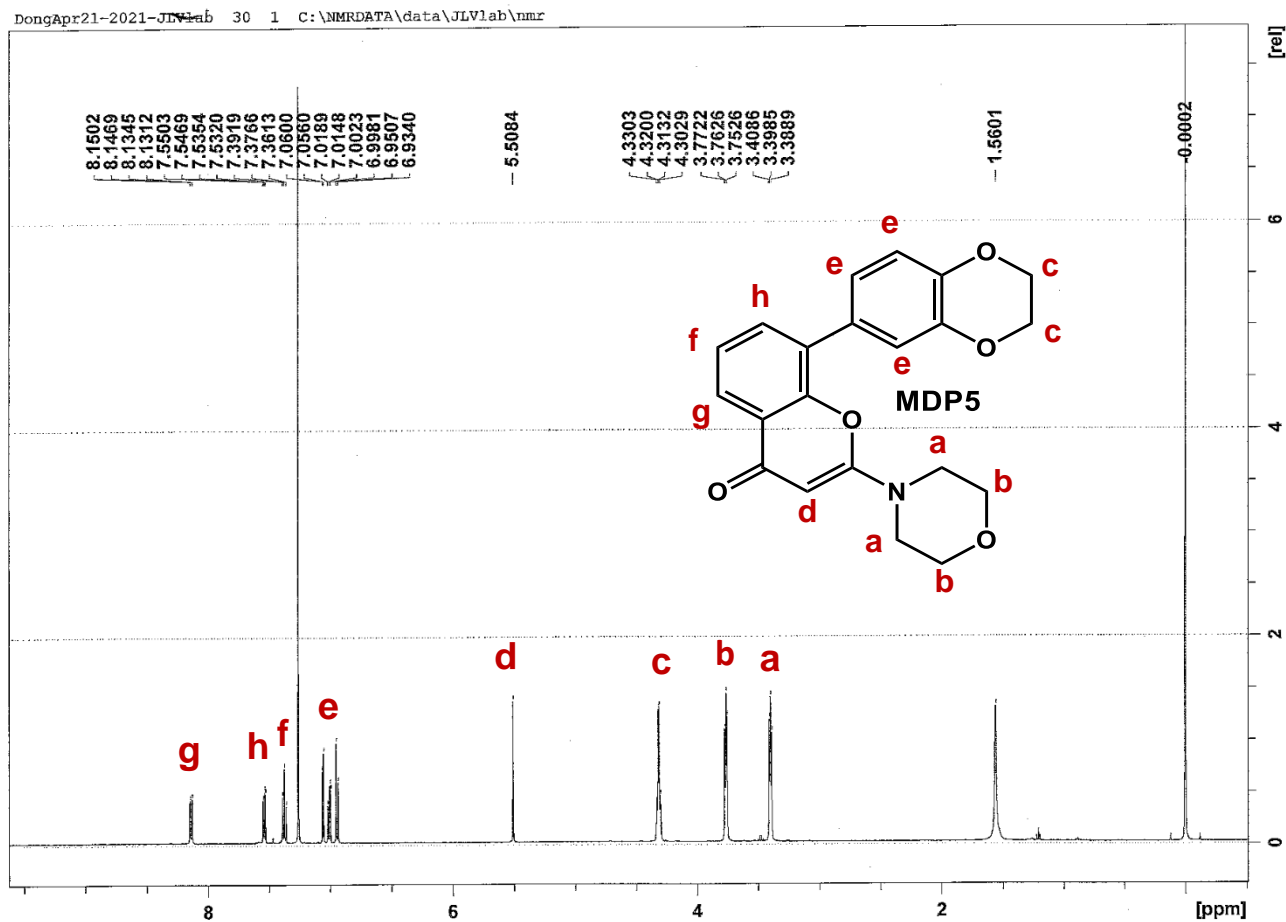

### b Mass spectra

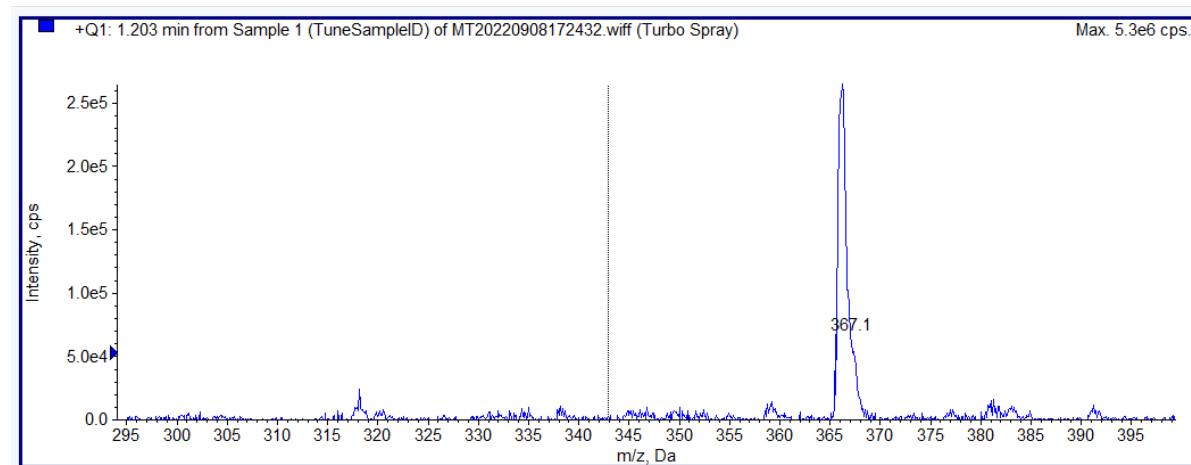

**Figure S2.** Characterization of MDP5. MDP5 structure was characterized by **a** <sup>1</sup>H NMR. **b** Mass spectrometer.

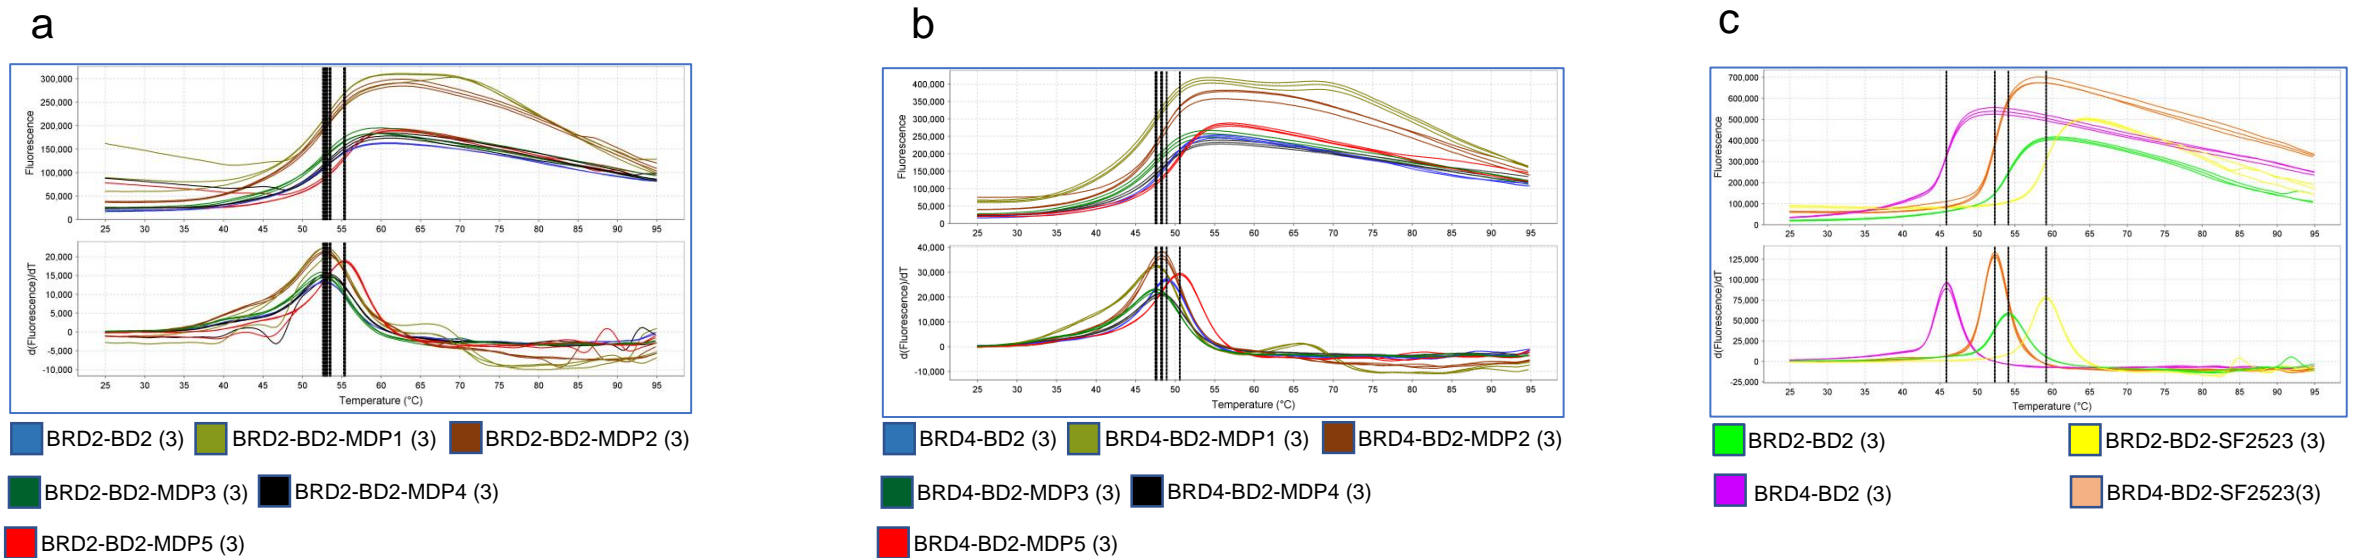

**d**

| $(T_m \pm SD) \text{ } ^\circ\text{C}$ |                |                |                |                |                |                |                |
|----------------------------------------|----------------|----------------|----------------|----------------|----------------|----------------|----------------|
|                                        | Protein Only   | MDP1           | MDP2           | MDP3           | MDP4           | MDP5           | SF2523         |
| BRD2-BD2                               | $52.9 \pm 0.1$ | $53.1 \pm 0.3$ | $52.9 \pm 0.1$ | $52.7 \pm 0.1$ | $53.3 \pm 0.2$ | $55.3 \pm 0.1$ | $59.2 \pm 0.0$ |
| BRD4-BD2                               | $48.9 \pm 0.0$ | $47.6 \pm 0.1$ | $48.3 \pm 0.1$ | $47.6 \pm 0.1$ | $48.3 \pm 0.1$ | $50.6 \pm 0.0$ | $52.3 \pm 0.0$ |

**Figure S3.** Protein thermal shift analysis results of MDP series and SF2523. **a** BRD2-BD2 with MDP series. **b** BRD4-BD2 with MDP series. **c** BRD2-BD2 and BRD4-BD2 with SF2523. **d** Summary of the protein thermal shift results.

**a DAOY Cells**

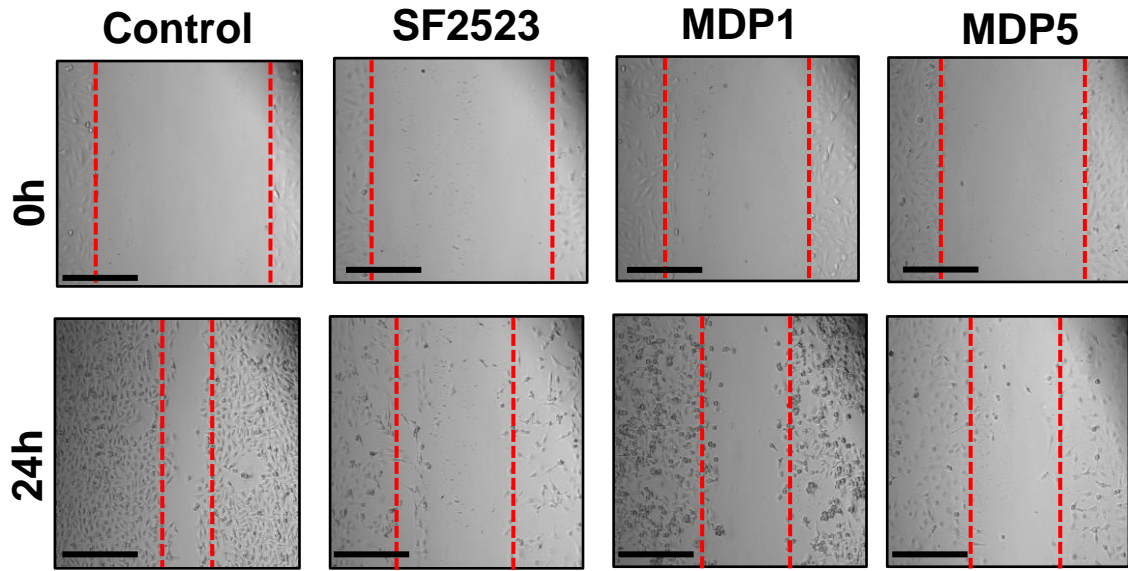

**b HD-MB03 cells**

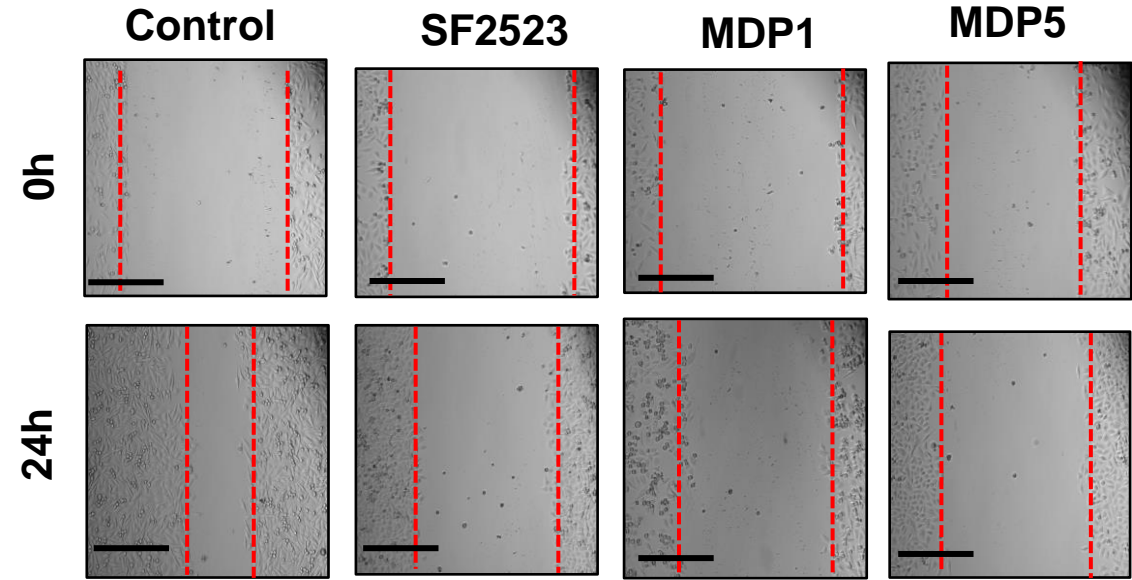

**Figure S4.** In vitro wound-healing/scratch assay. **a, b** DAOY and HD-MB03 cells were treated with 5.0  $\mu\text{M}$  of indicated drugs. Photomicrographs were obtained at the indicated time points using a 4X objective on an inverted microscope. Scale bar = 100  $\mu\text{m}$ .



## a Flow cytometry plots

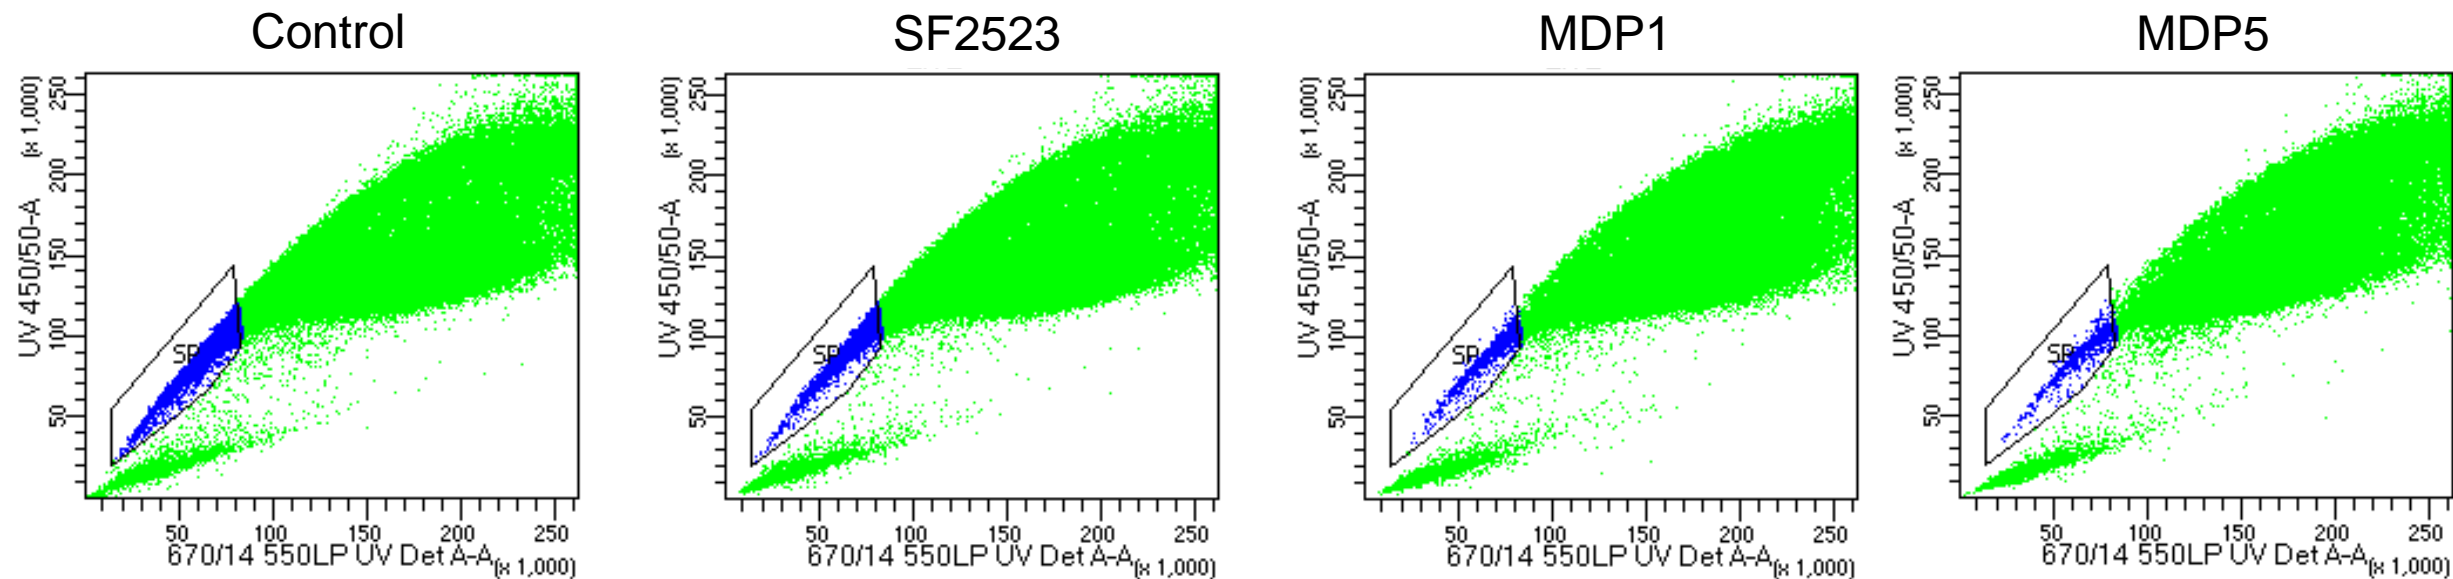

## b Side population

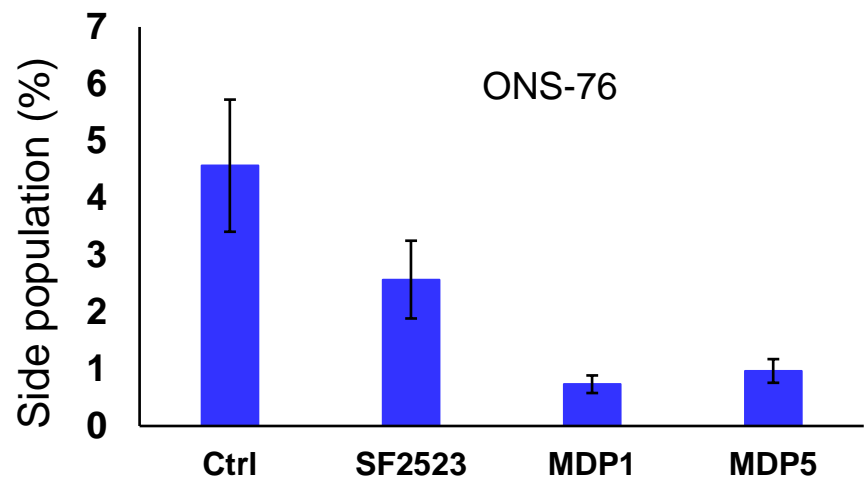

**Figure S5.** Effect of treatments on stem cell like side population in ONS-76 MB cells. **a** Representative flow cytometry plot. **b** Quantitation of % side population after treatment in ONS-76 cells.

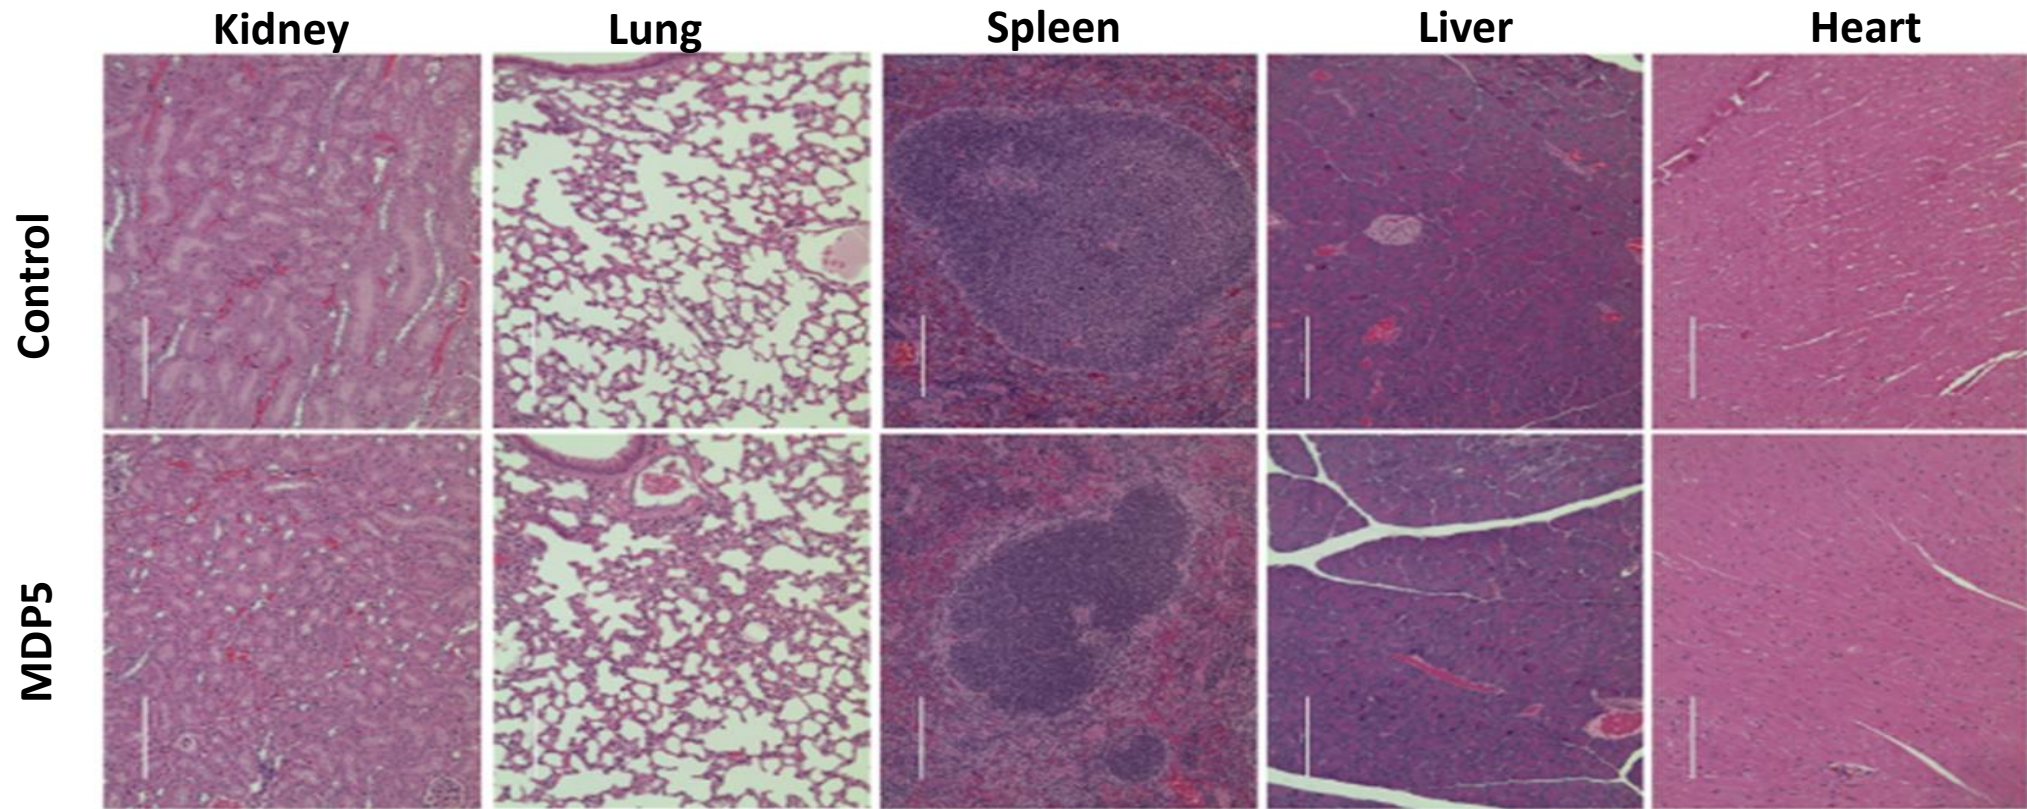

**Figure S6.** Histology examination of major organs including heart, liver, spleen, lung and kidney in mice of all treatment groups was performed.

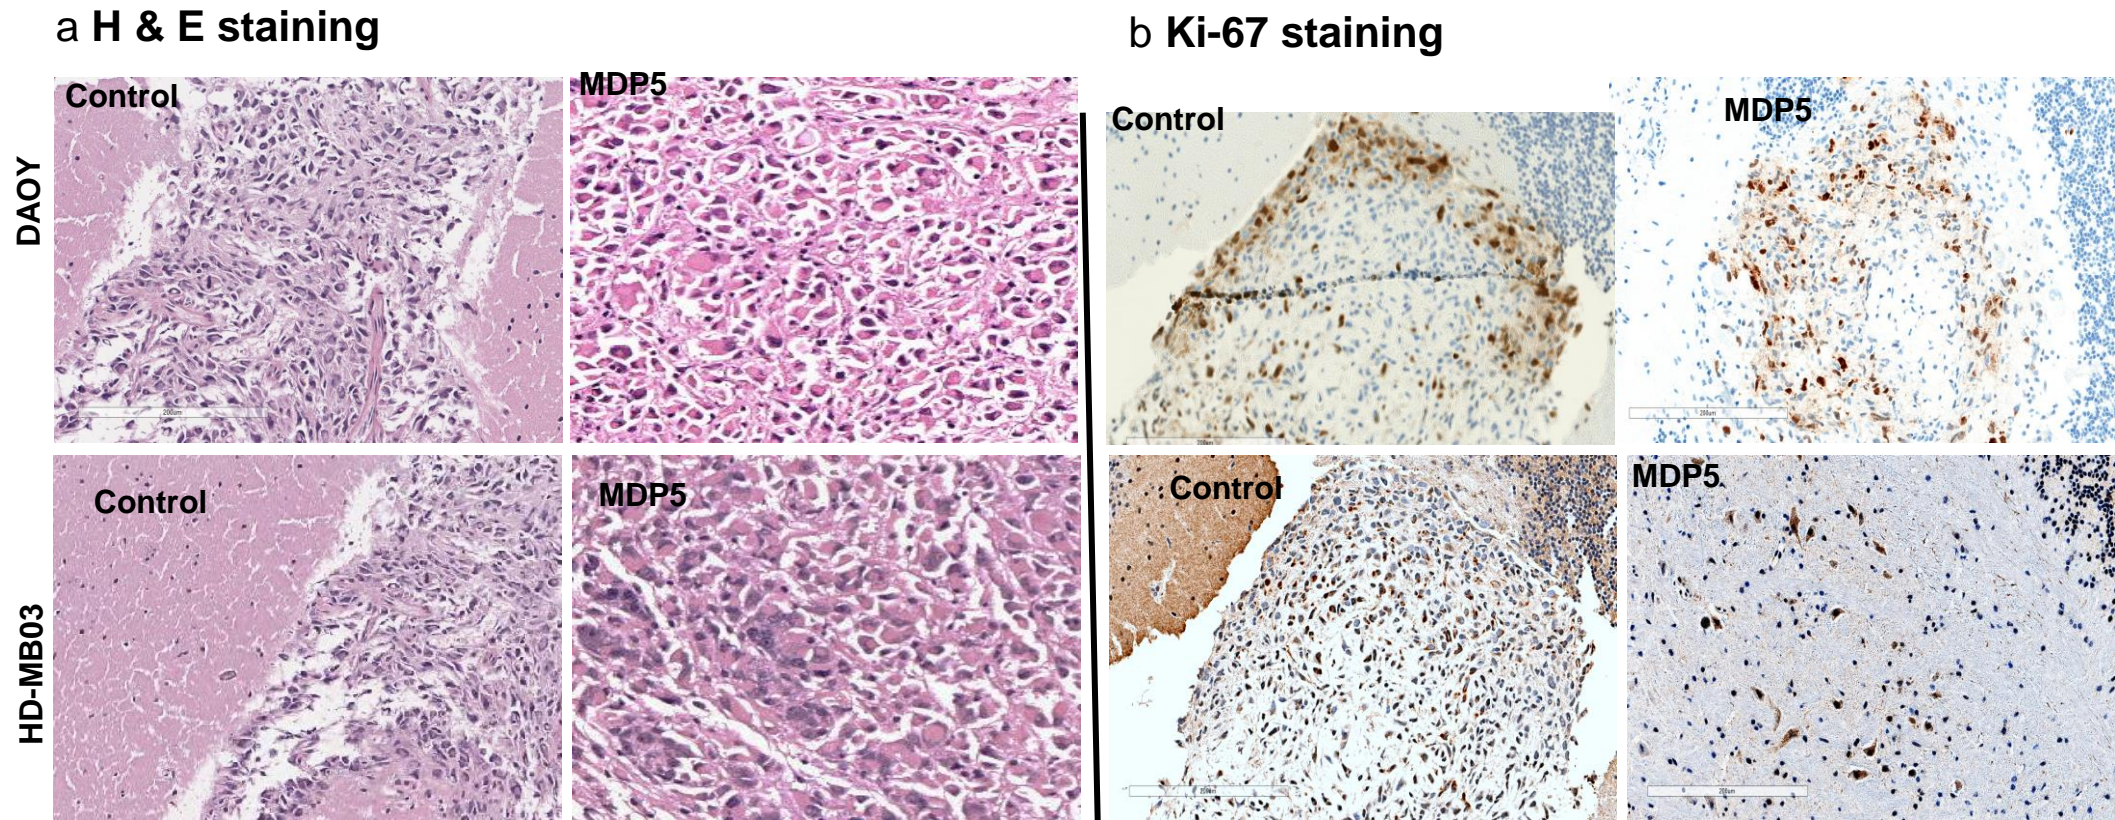

**Figure S7.** Immunohistochemical (IHC) staining of xenograft tumors. **a** H&E staining and **b** IHC staining of Ki67 of section of mice brain show the tumor and proliferating cells.

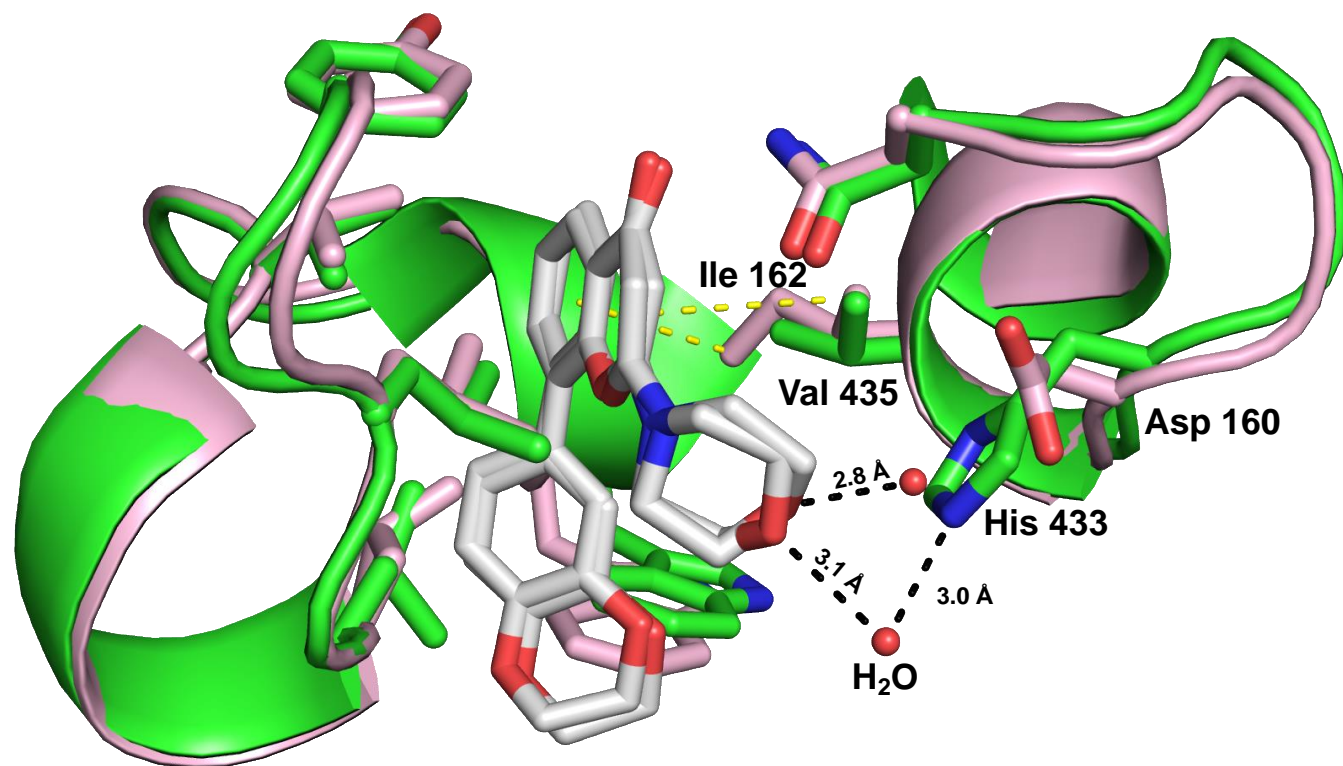

**Figure S8.** Superimposed acetyllysine binding pockets of BRD2-BD1(pink carbon atoms)/MDP5 and BRD2-BD2 (green carbon atoms)/MDP5 complexes.

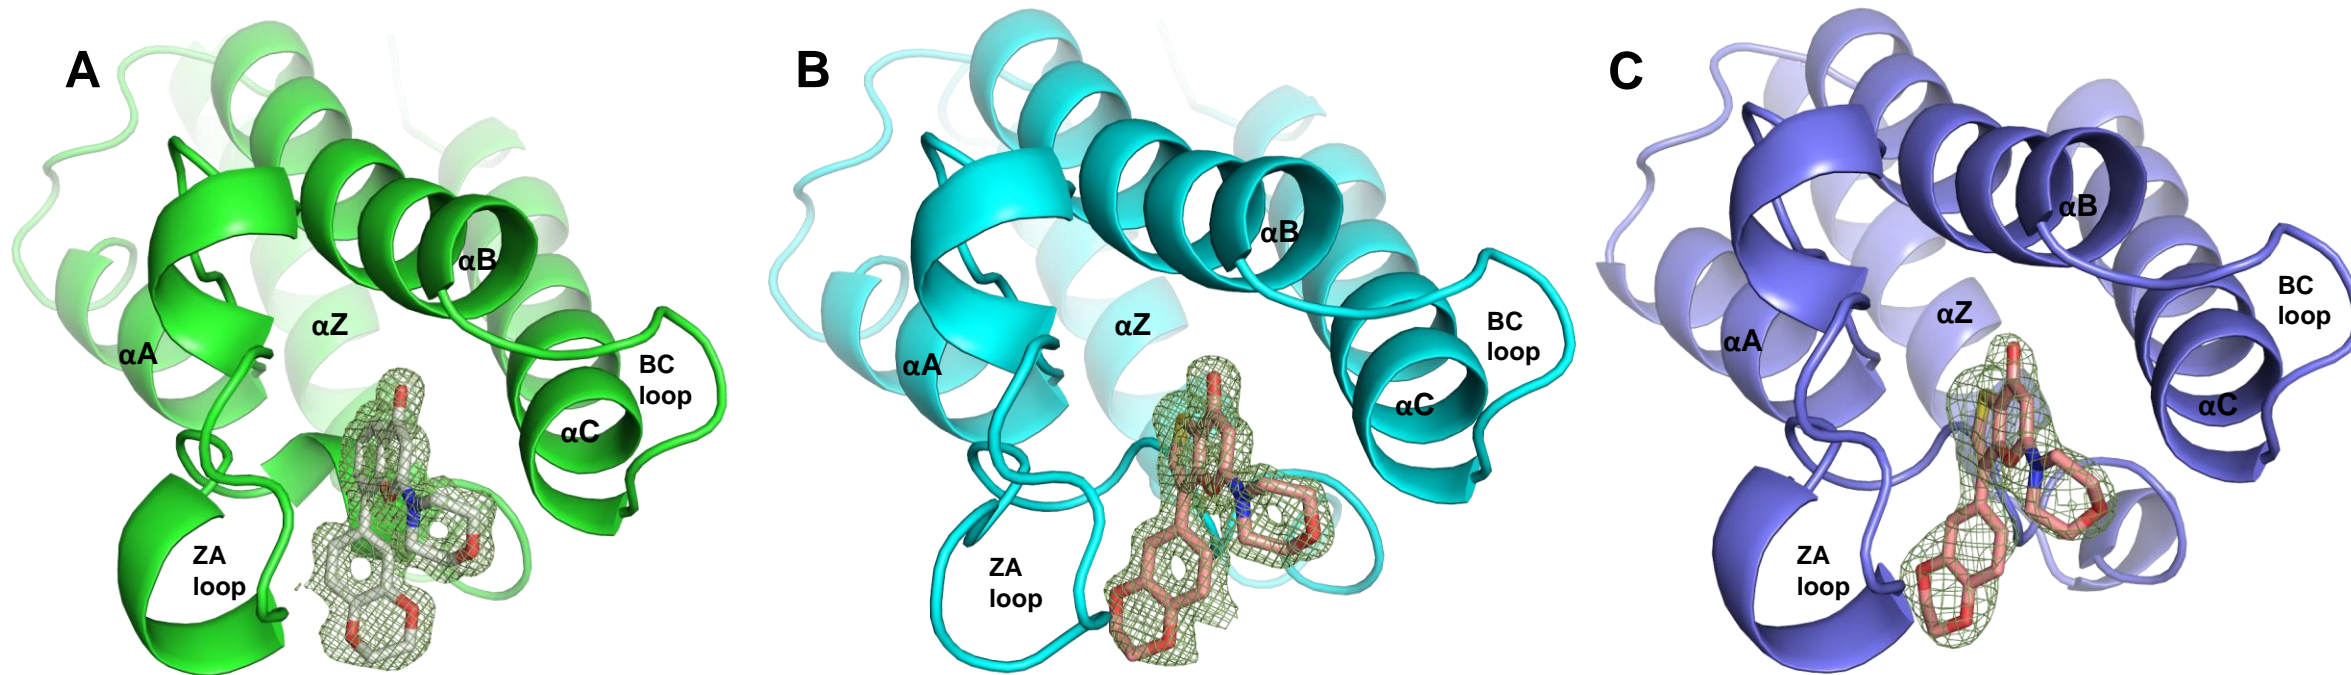

**Figure S9.** MDP5 and SF2523 bound acetyllysine binding pockets of BRD2-BD2 and BRD4-BD2. **A** BRD2-BD2/MDP5 complex structure. **B** BRD2-BD2/SF2523 complex structure. **C** BRD4-BD2/SF2523 complex structure. The 2F<sub>o</sub> - F<sub>c</sub> composite omit maps of all three structures are contoured at 1.5 $\sigma$ .

# **Supplementary Tables**

**Table S1.** Reagents for RT-PCR.

a

| Gene             | Forward                  | Reverse                  |
|------------------|--------------------------|--------------------------|
| <b>Cyclin D1</b> | AGCAACAGCAACGCAAAG       | AATAGCCAGGAGAGGAGGA      |
| <b>BCL2</b>      | ATTCGATCCACCCTTCAAG      | TTCCAGTTTCTCACCGTGTCACCT |
| <b>β-actin</b>   | TTAGTTGCGTTACACCCTTTCTTG | CTGTCACCTTCACCGTTCCAGTTT |

b

| Reagent                               | Supplier           | Catalog     |
|---------------------------------------|--------------------|-------------|
| RNA extraction kit (RNeasy)           | Qiagen             | 74004       |
| TaqMan Reverse Transcription Reagents | Applied Biosystems | N8080234    |
| SYBR Green, I Master                  | Roche              | 04707516001 |

**a** Sequence of forward and reverse primers used. **b** Reagents used for reverse transcriptase and polymerization chain reaction.

**Table S2.** Reagents used for Western blot analysis.

a

| Reagent                                       | Supplier          | Catalog  |
|-----------------------------------------------|-------------------|----------|
| Protease inhibitors                           | Sigma-Aldrich     | P8340    |
| Phosphatase inhibitors                        | Sigma-Aldrich     | P0044    |
| Peirce BCA assay kit                          | Thermo Scientific | 23227    |
| Laemmli                                       | Alfa Aesar        | J61337   |
| SDS page                                      | BIO-RAD           | 4561084  |
| Polyvinylidene difluoride (PVDF)              | Invitrogen        | IB401001 |
| Blotto, non-fat dry milk                      | ChemCruz          | sc2324   |
| Tris-buffered saline                          | Thermo Scientific | 28358    |
| Tween 20                                      | Sigma Aldrich     | P5927    |
| ECL™ start western blotting detection reagent | Cytiva Amersham   | RPN3244  |

b

| Primary antibodies | Dilution factor | Supplier                         | Catalog   |
|--------------------|-----------------|----------------------------------|-----------|
| GLI1               | 1:1000          | Abcam                            | ab134906  |
| GLI2               | 1:1000          | EMD Millipore Corp               | ABN2241   |
| MYCN               | 1:1000          | Santacruz Biotech;               | sc-53993  |
| p-MYCN             | 1:1000          | Bethyl                           | A300-206A |
| CyclinD1           | 1:1000          | Abcam                            | ab16663   |
| PI3K               | 1:1000          | Cell Signalling Technology (CST) | 13666S    |
| p-PI3K             | 1:500           | Biomatik                         | CAF11012  |
| Akt                | 1:1000          | CST                              | 9272S     |
| p-Akt              | 1:500           | CST                              | 4060S     |
| β-actin            | 1:1000          | Santacruz Biotech                | sc-69879  |

**a** Material used during Western blot. **b** Primary antibodies with dilution factor.



**Table S3.** Docking scores (kcal/mol) and errors ( $\Delta\Delta G$ , kcal/mol) between docking predicted and observed binding affinity of known BD1 and BD2 inhibitors.

| Compound        | BD1_Kd<br>(nM) | BD2_Kd<br>(nM) | RD0_d | BD1_d | BD2_d  | BD1_O | BD2_O  | $\Delta\Delta G_{BD}$<br>1 | $\Delta\Delta G_{BD}$<br>2 |
|-----------------|----------------|----------------|-------|-------|--------|-------|--------|----------------------------|----------------------------|
| <b>ABBV_744</b> | 2006           | 4              | -7.04 | -7.34 | -11.64 | -7.77 | -11.46 | -0.43                      | 0.19                       |
| <b>IBET_762</b> | 545            | 158            | -3.79 | -7.26 | -6.99  | -8.54 | -9.28  | -1.29                      | -2.29                      |
| <b>SF2523</b>   | 150            | 710            | -8.36 | -6.88 | -8.33  | -9.31 | -8.39  | -2.42                      | -0.06                      |
| <b>SF2535</b>   | 277            | 688            | -7.40 | -6.16 | -8.74  | -8.95 | -8.41  | -2.78                      | 0.34                       |
|                 |                |                |       |       |        |       | mean   | -1.73                      | -0.46                      |

Note:  $\Delta\Delta G = \Delta G$  (observed, BD1\_O, or BD2\_O) –  $\Delta G$  (predicted, BD1\_d, BD2\_d) , where BD1\_d, and BD2\_2 were measured by the docking scores obtained from the Glide Dock, and the  $\Delta G$  (observed) =  $1.987 \cdot 298.15 \cdot \ln(Kd \cdot 10^{-9}) / 1000$ , where Kd in nM concentration.

**Table S4.** Docking scores (kcal/mol) and predicted binding affinity (Kd,  $\mu$ M) of synthesized BD1 and BD2 inhibitors.

| <b>Compound</b>  | <b>Glide_RD0<br/>(kcal/mol)</b> | <b>Glide_BD1<br/>(kcal/mol)</b> | <b>Glide_BD2<br/>(kcal/mol)</b> | <b>PI3K_Pred<br/>(IC50 or<br/>KD, <math>\mu</math>M)</b> | <b>BD1_Pred<br/>(IC50 or<br/>KD, <math>\mu</math>M)</b> | <b>BD2_Pred<br/>(IC50 or<br/>KD, <math>\mu</math>M)</b> |
|------------------|---------------------------------|---------------------------------|---------------------------------|----------------------------------------------------------|---------------------------------------------------------|---------------------------------------------------------|
| <b>LY294002</b>  | -6.12                           | -7.42                           | -9.20                           | 32.41                                                    | 3.64                                                    | 0.18                                                    |
| <b>MDP1</b>      | -8.41                           | -6.93                           | -7.75                           | 0.68                                                     | 8.28                                                    | 2.08                                                    |
| <b>MDP2</b>      | -7.24                           | -7.34                           | -3.63                           | 4.94                                                     | 4.16                                                    | 2167.63                                                 |
| <b>MDP3</b>      | -4.95                           | -6.77                           | -5.21                           | 234.31                                                   | 10.87                                                   | 152.10                                                  |
| <b>MDP4</b>      | -6.26                           | -6.36                           | -6.86                           | 25.85                                                    | 21.72                                                   | 9.34                                                    |
| <b>MDP5</b>      | -7.31                           | -7.91                           | -9.29                           | 4.38                                                     | 1.59                                                    | 0.16                                                    |
| <b>Quercetin</b> | -8.42                           | -9.48                           | -8.83                           | 0.67                                                     | 0.11                                                    | 0.33                                                    |

Please note the predicted IC<sub>50</sub> or Kd is based on docking score conversion and due to the errors as seen in Table 1, they may not be exactly the same as what you have from experimentally. If the trends turn out to be right, it would be good. Note: Predicted Kd =  $e^{((\text{Glide\_score} * 1000)/(1.987 * 298.15))} * 10^6$ , Kd unit:  $\mu$ M.

**Table S5. X-ray and crystallographic statistics.**

|                                      | BRD2-BD2/MDP5 | BRD2-BD2/MDP5 | BRD2-BD2/SF2523 | BRD4-BD2/SF2523 | BRD4-BD2      |
|--------------------------------------|---------------|---------------|-----------------|-----------------|---------------|
| X-ray diffraction                    |               |               |                 |                 |               |
| Wavelength (Å)                       | 0.98          | 0.98          | 0.98            | 0.98            | 0.98          |
| Space group                          | P 1 21 1      | P 21 21 2     | P 21 21 2       | P 43 21 2       | P 21 21 2     |
| Unit cell dimensions                 |               |               |                 |                 |               |
| a (Å)                                | 63.810        | 52.560        | 52.345          | 77.625          | 55.785        |
| b (Å)                                | 149.872       | 72.277        | 71.732          | 77.625          | 73.054        |
| c (Å)                                | 63.819        | 32.213        | 32.096          | 100.645         | 32.309        |
| $\alpha$                             | 90°           | 90°           | 90°             | 90°             | 90°           |
| $\beta$                              | 112.3°        | 90°           | 90°             | 90°             | 90°           |
| $\gamma$                             | 90°           | 90°           | 90°             | 90°             | 90°           |
| Resolution (Å)                       | 35.56 - 2.5   | 19.29-1.20    | 29.59 - 1.27    | 32.82 - 2.08    | 19.45 - 1.22  |
| R <sub>pim</sub>                     | 0.048 (0.402) | 0.039 (0.385) | 0.041 (0.380)   | 0.055 (0.643)   | 0.036 (0.239) |
| R <sub>merge</sub>                   | 0.126 (1.065) | 0.106 (1.083) | 0.111 (0.753)   | 0.192 (1.075)   | 0.077 (0.452) |
| CC <sub>1/2</sub>                    | 0.978 (0.834) | 0.991 (0.762) | 0.990 (0.699)   | 0.999 (0.627)   | 0.999 (0.832) |
| I/ $\sigma$ I                        | 24.6 (2.0)    | 28.7 (3.4)    | 28.8 (1.3)      | 15.1 (1.2)      | 37.9 (3.6)    |
| Completeness (%)                     | 99.69 (99.64) | 91.85 (90.65) | 98.76 (93.20)   | 99.55 (99.84)   | 95.77 (99.86) |
| Refinement                           |               |               |                 |                 |               |
| Total no. of reflections             | 1368277       | 832780        | 842847          | 3050708         | 439225        |
| No. of unique reflections            | 38336 (3873)  | 35994 (3501)  | 32284 (2984)    | 19034 (1874)    | 41150 (4228)  |
| R <sub>work</sub> /R <sub>free</sub> | 0.2015/0.2497 | 0.1772/0.1973 | 0.1674/0.1913   | 0.2116/0.2654   | 0.2124/0.2305 |
| No. of atoms                         |               |               |                 |                 |               |
| Protein                              | 5537          | 926           | 941             | 1777            | 882           |
| Ligand/ion                           | 376           | 36            | 50              | 52              | 24            |
| Water                                | 75            | 249           | 195             | 117             | 188           |
| B-factors (Å <sup>2</sup> )          |               |               |                 |                 |               |
| Protein                              | 54.42         | 12.72         | 17.38           | 52.01           | 18.36         |
| Ligand/ion                           | 65.76         | 16.82         | 28.56           | 53.38           | 31.73         |
| Water                                | 53.00         | 23.46         | 29.99           | 52.99           | 28.59         |
| R.m.s deviations                     |               |               |                 |                 |               |
| Bond length (Å)                      | 0.009         | 0.007         | 0.011           | 0.009           | 0.006         |
| Bond angles (°)                      | 1.00          | 1.00          | 1.06            | 1.05            | 1.54          |
| Ramachandran                         |               |               |                 |                 |               |
| Favored (%)                          | 98.17         | 100.00        | 100.00          | 99.07           | 100.00        |
| Outliers (%)                         | 0.00          | 0.00          | 0.00            | 0.00            | 0.00          |

|                                      | BRD2-BD2/MDP5  | BRD2-BD2/SF2523 | BRD4-BD2/SF2523 | BRD4-BD2      |
|--------------------------------------|----------------|-----------------|-----------------|---------------|
| Data collection                      |                |                 |                 |               |
| Wavelength (Å)                       | 0.98           | 0.98            | 0.98            | 0.98          |
| Space group                          | P 21 21 2      | P 21 21 2       | P 43 21 2       | P 21 21 2     |
| Unit cell dimensions                 |                |                 |                 |               |
| a (Å)                                | 52.560         | 52.345          | 77.625          | 55.785        |
| b (Å)                                | 72.277         | 71.732          | 77.625          | 73.054        |
| c (Å)                                | 32.213         | 32.096          | 100.645         | 32.309        |
| $\alpha$                             | 90°            | 90°             | 90°             | 90°           |
| $\beta$                              | 90°            | 90°             | 90°             | 90°           |
| $\gamma$                             | 90°            | 90°             | 90°             | 90°           |
| Resolution (Å)                       | 19.29-1.20     | 29.59 - 1.27    | 32.82 - 2.08    | 19.45 - 1.22  |
| R <sub>pim</sub>                     | 0.039 (0.385)  | 0.041 (0.380)   | 0.055 (0.643)   | 0.036(0.239)  |
| R <sub>merge</sub>                   | 0.106 (1.083)  | 0.111 (0.753)   | 0.192 (1.075)   | 0.077 (0.452) |
| CC <sub>1/2</sub>                    | 0.991 (0.762)  | 0.990 (0.699)   | 0.999 (0.627)   | 0.999 (0.832) |
| I/ $\sigma$ I                        | 28.7 (3.4)     | 28.8 (1.3)      | 15.1 (1.2)      | 37.9 (3.6)    |
| Completeness (%)                     | 91.85 (90.65)  | 98.76( 93.20)   | 99.55 (99.84)   | 95.77 (99.86) |
| Refinement                           |                |                 |                 |               |
| Total no. of reflections             | 832780         | 842847          | 3050708         | 439225        |
| No. of unique reflections            | 35994 (3501)   | 32284 (2984)    | 19034 (1874)    | 41150 (4228)  |
| R <sub>work</sub> /R <sub>free</sub> | 0.1772/ 0.1973 | 0.1674/ 0.1913  | 0.2116/0.2654   | 0.2124/0.2305 |
| No. of atoms                         |                |                 |                 |               |
| Protein                              | 926            | 941             | 1777            | 882           |
| Ligand/ion                           | 36             | 50              | 52              | 24            |
| Water                                | 249            | 195             | 117             | 188           |
| B-factors (Å <sup>2</sup> )          |                |                 |                 |               |
| Protein                              | 12.72          | 17.38           | 52.01           | 18.36         |
| Ligand/ion                           | 16.82          | 28.56           | 53.38           | 31.73         |
| Water                                | 23.46          | 29.99           | 52.99           | 28.59         |
| R.m.s deviations                     |                |                 |                 |               |
| Bond length (Å)                      | 0.007          | 0.011           | 0.009           | 0.006         |
| Bond angles (°)                      | 1.00           | 1.06            | 1.05            | 1.54          |
| Ramachandran                         |                |                 |                 |               |
| Favored (%)                          | 100.00         | 100.00          | 99.07           | 100.00        |
| Outliers (%)                         | 0.00           | 0.00            | 0.00            | 0.00          |

**a** X-ray diffraction and crystallographic refinement statistics for the four described structures. **b** Crystallographic data table of BRD2-BD2/MDP5, BRD2-BD2/SF2523, BRD4-BD2/SF2523, and BRD4-BD2/Apo structures. Values for the highest resolution shell are
